# Supplementary material for: COVID-19 and HIV: Clinical Outcomes among Hospitalized Patients in the United States
Source: MDPI journal article supplement (doi:10.3390/biomedicines11071904), 2023-07-05
Supplement: s1 [file s1]

# Supplementary Materials

**Table S1.** ICD10 Clinical Modification Codes.

| Disease/Procedure                   | ICD Codes                                                                                                                                                                                                                                                                                                                                                                                                                                                                                                                                                       |
|-------------------------------------|-----------------------------------------------------------------------------------------------------------------------------------------------------------------------------------------------------------------------------------------------------------------------------------------------------------------------------------------------------------------------------------------------------------------------------------------------------------------------------------------------------------------------------------------------------------------|
| Covid 19                            | U071, U00, U49, U50, U85, J1282                                                                                                                                                                                                                                                                                                                                                                                                                                                                                                                                 |
| HIV                                 | B20, Z21                                                                                                                                                                                                                                                                                                                                                                                                                                                                                                                                                        |
| Vasopressor use                     | 3E030XZ,3E033XZ,3E040XZ,3E043XZ,3E050XZ,3E053XZ,3E060XZ,3E063XZ                                                                                                                                                                                                                                                                                                                                                                                                                                                                                                 |
| Mechanical Circulatory Support      | 5A02110, 5A02210, 5A0211D, 02HA3RZ, 5A02116, 5A0221D, 5A1522F, 5A1522G, 5A1522H, 5A15A2F, 5A15A2G, 5A15A2H, 5A15223                                                                                                                                                                                                                                                                                                                                                                                                                                             |
| Mechanical ventilation invasive     | 0BH17EZ, 0BH18EZ, 5A1935Z, 5A0945Z, 5A0955Z                                                                                                                                                                                                                                                                                                                                                                                                                                                                                                                     |
| Non-invasive mechanical ventilation | 5A09457, 5A09458, 5A09358, 5A09557, 5A09558, 5A09357                                                                                                                                                                                                                                                                                                                                                                                                                                                                                                            |
| Sudden cardiac arrest               | I462, I468, I469                                                                                                                                                                                                                                                                                                                                                                                                                                                                                                                                                |
| Hemodialysis                        | 5A1D70Z,5A1D90Z,5A1D80Z,5A1D00Z,5A1D60Z                                                                                                                                                                                                                                                                                                                                                                                                                                                                                                                         |
| Cardiogenic Shock                   | R570                                                                                                                                                                                                                                                                                                                                                                                                                                                                                                                                                            |
| CKD                                 | N181, N182, N1830, N1831, N1832, N184, N185, N189                                                                                                                                                                                                                                                                                                                                                                                                                                                                                                               |
| AKI                                 | N170,N171,N172,N178,N179, N990                                                                                                                                                                                                                                                                                                                                                                                                                                                                                                                                  |
| Acute liver failure                 | K7200, K7201, K712                                                                                                                                                                                                                                                                                                                                                                                                                                                                                                                                              |
| VTE                                 | I82210,I82220,I82290,I82401,I82402,I82403,I82409,I82411, I82412,I82413,I82419,I82421,I82422,I82423,I82429,I82431,I82432, I82433,I82439,I82441,I82442,I82443,I82449,I82451,I82452, I82453,I82459,I82461,I82462,I82463,I82469,I82491,I82492,I82493, I82499,I824Y1,I824Y2,I824Y3,I824Y9,I824Z1,I824Z2,I824Z3,I824Z9, I82601,I82602,I82603,I82609,I82611,I82612,I82613,I82619,I82621, I82622,I82623,I82629,I82890,I8290,I82A11,I82A12,I82A13,I82A19, I82B11,I82B12,I82B13,I82B19,I82C11,I82C12,I82C13,I82C19,I1260, I2601,I2602,I2690,I2692,I2693,I2694,I2699,I2609 |
| Smoking                             | F17, F172, F1720, F17200, F17201, F17203, F17208, F17209, F1721, F17210, F17211, F17213, F17218, F17219, F1722, F17220, F17221, F17223, F17228, F17229, F1729, F17290, F17291, F17293, F17298, F17299, Z87891                                                                                                                                                                                                                                                                                                                                                   |
| Hx of PCI                           | Z9861, Z9861                                                                                                                                                                                                                                                                                                                                                                                                                                                                                                                                                    |
| Hx of CABG                          | Z951                                                                                                                                                                                                                                                                                                                                                                                                                                                                                                                                                            |
| Previous MI                         | I252                                                                                                                                                                                                                                                                                                                                                                                                                                                                                                                                                            |
| CAD                                 | I2510, I25111, I25118, I25119, I252, I253, I254, I2541, I2542, I255, I256, I257, I2570, I25700, I25701, I25708, I25709, I2571, I25710, I25711, I25718, I25719, I2572, I25720, I25721, I25728, I25729, I2573, I25730, I25731, I25738, I25739, I2575, I25750, I25751, I25758, I25759, I2576, I25760, I25761, I25768, I25769                                                                                                                                                                                                                                       |
| Chronic Pulmonary Disease           | Elixhauser comorbidities index                                                                                                                                                                                                                                                                                                                                                                                                                                                                                                                                  |
| Diabetes (2 types)                  | Elixhauser comorbidities index                                                                                                                                                                                                                                                                                                                                                                                                                                                                                                                                  |
| AIDS                                | Elixhauser comorbidities index                                                                                                                                                                                                                                                                                                                                                                                                                                                                                                                                  |
| Hypothyroidism                      | Elixhauser comorbidities index                                                                                                                                                                                                                                                                                                                                                                                                                                                                                                                                  |
| Autoimmune                          | Elixhauser comorbidities index                                                                                                                                                                                                                                                                                                                                                                                                                                                                                                                                  |
| Dementia                            | Elixhauser comorbidities index                                                                                                                                                                                                                                                                                                                                                                                                                                                                                                                                  |
| Depression                          | Elixhauser comorbidities index                                                                                                                                                                                                                                                                                                                                                                                                                                                                                                                                  |
| Lymphoma                            | Elixhauser comorbidities index                                                                                                                                                                                                                                                                                                                                                                                                                                                                                                                                  |

|                                             |                                                                                                                                                                                                                                                                                                                                                                                                                                                                                                                                                                                                                                                                                                                                                                                                                                                                                                                                                                                    |
|---------------------------------------------|------------------------------------------------------------------------------------------------------------------------------------------------------------------------------------------------------------------------------------------------------------------------------------------------------------------------------------------------------------------------------------------------------------------------------------------------------------------------------------------------------------------------------------------------------------------------------------------------------------------------------------------------------------------------------------------------------------------------------------------------------------------------------------------------------------------------------------------------------------------------------------------------------------------------------------------------------------------------------------|
| Leukemia                                    | Elixhauser comorbidities index                                                                                                                                                                                                                                                                                                                                                                                                                                                                                                                                                                                                                                                                                                                                                                                                                                                                                                                                                     |
| Metastatic Cancer                           | Elixhauser comorbidities index                                                                                                                                                                                                                                                                                                                                                                                                                                                                                                                                                                                                                                                                                                                                                                                                                                                                                                                                                     |
| Solid Tumor Without Metastasis<br>(2 types) | Elixhauser comorbidities index                                                                                                                                                                                                                                                                                                                                                                                                                                                                                                                                                                                                                                                                                                                                                                                                                                                                                                                                                     |
| Obesity                                     | Elixhauser comorbidities index                                                                                                                                                                                                                                                                                                                                                                                                                                                                                                                                                                                                                                                                                                                                                                                                                                                                                                                                                     |
| Drug Abuse                                  | Elixhauser comorbidities index                                                                                                                                                                                                                                                                                                                                                                                                                                                                                                                                                                                                                                                                                                                                                                                                                                                                                                                                                     |
| Hypertension (2 types)                      | Elixhauser comorbidities index                                                                                                                                                                                                                                                                                                                                                                                                                                                                                                                                                                                                                                                                                                                                                                                                                                                                                                                                                     |
| PAD Peripheral vascular disease             | Elixhauser comorbidities index                                                                                                                                                                                                                                                                                                                                                                                                                                                                                                                                                                                                                                                                                                                                                                                                                                                                                                                                                     |
| Alcohol                                     | Elixhauser comorbidities index                                                                                                                                                                                                                                                                                                                                                                                                                                                                                                                                                                                                                                                                                                                                                                                                                                                                                                                                                     |
| Cerebrovascular accident                    | I6000, I6001, I6002, I6010, I6011, I6012, I602, I6020, I6021, I6022, I6030, I6031, I6032, I604, I6050, I6051, I6052, I606, I607, I608, I609, I610, I611, I612, I613, I614, I615, I616, I618, I619, I6200, I6201, I6202, I6203, I621, I629, I6300, I63011, I63012, I63013, I63019, I6302, I63031, I63032, I63033, I63039, I6309, I6310, I63111, I63112, I63113, I63119, I6312, I63131, I63132, I63133, I63139, I6319, I6320, I63211, I63212, I63213, I63219, I6322, I63231, I63232, I63233, I63239, I6329, I6330, I63311, I63312, I63313, I63319, I63321, I63322, I63323, I63329, I63331, I63332, I63333, I63339, I63341, I63342, I63343, I63349, I6339, I6340, I63411, I63412, I63413, I63419, I63421, I63422, I63423, I63429, I63431, I63432, I63433, I63439, I63441, I63442, I63443, I63449, I6349, I6350, I63511, I63512, I63513, I63519, I63521, I63522, I63523, I63529, I63531, I63532, I63533, I63539, I63541, I63542, I63543, I63549, I6359, I636, I638, I6381, I6389, I639 |

**Table S2.** Propensity Matched: Baseline Patients Characteristics 1:1 Propensity matched variables: Age, race, income and insurance status, sex.

| Characteristics            | COVID and HIV– | COVID and HIV+ | P value |
|----------------------------|----------------|----------------|---------|
|                            | %              | %              |         |
| n = 15,880                 | 7940 (50 %)    | 7940 (50 % )   | --      |
| <b>Gender (%)</b>          | %              | %              | 0.234   |
| Female                     | 29.97          | 31.92          |         |
| Male                       | 70.02          | 68.07          |         |
| <b>Mean Age Years (SD)</b> | <b>SD</b>      | <b>SD</b>      |         |
| Female                     | 54.23 (15.67)  | 54.32 (13.50)  |         |
| Male                       | 54.8 (14.58)   | 54.35 (3.55)   |         |
| <b>AGE Groups (%)</b>      | %              | %              | <0.001  |
| 18-29                      | 6.61           | 5.16           |         |
| 30-49                      | 27.52          | 28.09          |         |
| 50-69                      | 50.06          | 55.23          |         |
| >=70                       | 15.81          | 11.52          |         |
| <b>RACE (%)</b>            | %              | %              | 0.961   |
| Asian or Pacific           | 1.20           | 1.32           |         |
| Black                      | 56.30          | 55.86          |         |
| Hispanic                   | 17.76          | 18.83          |         |
| Native American            | 0.57           | 0.44           |         |

|                                     |          |          |                  |
|-------------------------------------|----------|----------|------------------|
| Other                               | 4.60     | 4.41     |                  |
| White                               | 19.58    | 19.14    |                  |
| <b>MEDIAN HOUSEHOLD INCOME (%)</b>  | <b>%</b> | <b>%</b> | <b>0.731</b>     |
| <= 49,999                           | 49.43    | 48.11    |                  |
| 50k-64,999                          | 25.56    | 25.38    |                  |
| 65k-85,999                          | 15.36    | 15.81    |                  |
| >=86k                               | 9.65     | 10.71    |                  |
| <b>INSURANCE STATUS (%)</b>         | <b>%</b> | <b>%</b> | <b>0.938</b>     |
| Medicaid                            | 24.69    | 26.20    |                  |
| Medicare                            | 38.73    | 37.91    |                  |
| No charge                           | 0.44     | 0.44     |                  |
| Other                               | 5.04     | 5.10     |                  |
| Private Insurance                   | 25.76    | 24.75    |                  |
| Self-pay                            | 5.35     | 5.60     |                  |
| <b>HOSPITAL DIVISION (%)</b>        | <b>%</b> | <b>%</b> | <b>&lt;0.001</b> |
| East North Central                  | 17.19    | 12.47    |                  |
| East South Central                  | 4.35     | 6.42     |                  |
| Middle Atlantic                     | 33.12    | 10.71    |                  |
| Mountain                            | 2.14     | 4.53     |                  |
| New England                         | 10.96    | 6.05     |                  |
| Pacific                             | 3.46     | 5.29     |                  |
| South Atlantic                      | 17.25    | 38.35    |                  |
| West North Central                  | 4.09     | 1.64     |                  |
| West South Central                  | 7.43     | 14.55    |                  |
| <b>HOSPITAL BEDSIZE (%)</b>         | <b>%</b> | <b>%</b> | <b>0.280</b>     |
| Large                               | 47.54    | 49.81    |                  |
| Medium                              | 28.72    | 28.65    |                  |
| Small                               | 23.74    | 21.54    |                  |
| <b>HOSPITAL TEACHING STATUS (%)</b> | <b>%</b> | <b>%</b> | <b>&lt;0.001</b> |
| Rural                               | 5.29     | 3.15     |                  |
| Urban nonteaching                   | 10.01    | 13.85    |                  |
| Urban teaching                      | 84.70    | 83.00    |                  |
| <b>COMORBIDITIES (%)</b>            | <b>%</b> | <b>%</b> |                  |
| CAD                                 | 14.10    | 12.40    | 0.157            |
| MI                                  | 3.77     | 3.46     | 0.634            |
| HTN                                 | 62.34    | 60.51    | 0.290            |
| Diabetes (2)                        | 38.66    | 37.46    | 0.487            |
| Cancer (5)                          | 5.22     | 5.91     | 0.394            |
| Obesity                             | 21.78    | 21.59    | 0.897            |
| Drug Abuse                          | 6.80     | 7.68     | 0.337            |
| Smoking                             | 30.47    | 33.81    | 0.044            |
| Alcohol                             | 3.84     | 3.52     | 0.637            |
| Chronic Pulmonary Disease           | 23.23    | 24.43    | 0.428            |
| Peripheral Vascular Disease         | 2.45     | 2.77     | 0.578            |
| CKD                                 | 10.01    | 13.16    | 0.005            |
| Hypothyroidism                      | 4.65     | 5.60     | 0.227            |
| Autoimmune                          | 1.70     | 1.57     | 0.779            |
| Depression                          | 12.97    | 13.41    | 0.713            |
| Dementia                            | 4.84     | 6.17     | 0.102            |

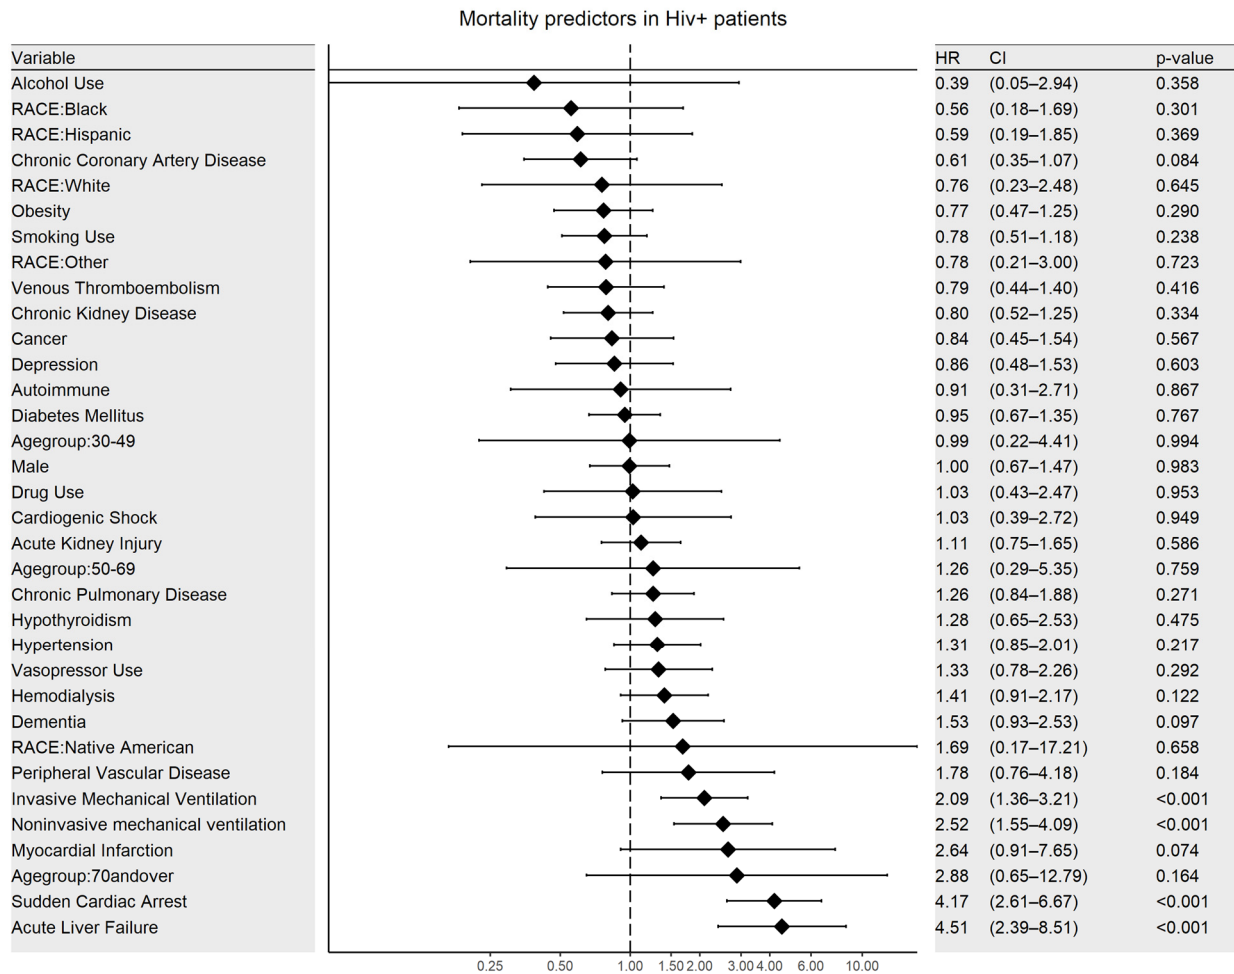

**Figure S1.** Mortality predictors in HIV+ patients.
